# Supplementary material for: Involvement of the Post-Transcriptional Regulator Hfq in Yersinia pestis Virulence
Source: PLoS One. 2009 Jul 10;4(7):e6213. doi: 10.1371/journal.pone.0006213 (PMC2704395; doi:10.1371/journal.pone.0006213)
Supplement: Table S1 — Hfq-dependent genes of Y. pestis as determined by microarray analysis. (0.07 MB XLS) [file pone.0006213.s001.xls]

## Sheet: Sheet1
Table S1 Hfq-dependent genes of Y. pestis as determined by microarray analysis.
Gene ID	Log2 ratios	Fold changes	Gene name	Function	Plasmids or Functional class
YPCD1.12c	1.94351	3.84641	sopB	putative plasmid partitioning control protein, sopB	pCD1
YPCD1.13c	2.23173	4.69696	sopA	putative plasmid partitioning transcription repressor, sopA	pCD1
YPCD1.17c	1.12166	2.17597	ylpA	putative lipoprotein precursor pseudogene, ylpA (pseudogene)	pCD1
YPCD1.20	2.16524	4.48541	yopT	putative cytotoxic effector protein, yopT	pCD1
YPCD1.21	1.99972	3.99922	sycT	putative yopT chaperone, sycT	pCD1
YPCD1.23	2.27365	4.83545	Y0062	hypothetical protein, Y0062	pCD1
YPCD1.26c	3.84783	14.3983	yopM	probable targeted effector protein , yopM	pCD1
YPCD1.31c	1.7533	3.37128	lcrV	putative V antigen, antihost protein/regulator, lcrV	pCD1
YPCD1.32c	1.52874	2.88533	lcrG	putative Yop regulator, lcrG	pCD1
YPCD1.48	3.1023	8.58789	virG	putative Yop targeting lipoprotein, virG	pCD1
YPCD1.49	2.98377	7.91051	lcrF, virF	putative thermoregulatory protein, lcrF, virF	pCD1
YPCD1.51	2.26207	4.79678	yscB	hypothetical protein, yscB	pCD1
YPCD1.52	1.8394	3.5786	yscC	putative type III secretion protein, yscC	pCD1
YPCD1.53	1.46597	2.76249	yscD	putative type III secretion protein, yscD	pCD1
YPCD1.54	1.31749	2.49233	yscE	putative type III secretion protein, yscE	pCD1
YPCD1.55	1.59553	3.02207	yscF	putative type III secretion protein, yscF	pCD1
YPCD1.56	1.28027	2.42884	yscG	putative type III secretion protein, yscG	pCD1
YPCD1.57	1.13546	2.19688	yscH, yopR, lcrP	putative type III secretion protein, yscH, yopR, lcrP	pCD1
YPCD1.58	1.21728	2.32508	yscI, lcrO	putative type III secretion protein, yscI, lcrO	pCD1
YPCD1.59	1.21609	2.32317	yscJ, ylpB	putative type III secretion lipoprotein, yscJ, ylpB	pCD1
YPCD1.60	1.02645	2.03701	yscK	putative type III secretion protein, yscK	pCD1
YPCD1.61	1.46436	2.75941	yscL	putative type III secretion protein, yscL	pCD1
YPCD1.62	2.11346	4.32729	yscM, lcrQ	putative type III secretion regulatory protein, yscM, lcrQ	pCD1
YPCD1.71c	3.181	9.06939	yopP, yopJ	putative targeted effector protein, yopP, yopJ	pCD1
YPCD1.72c	1.82712	3.54828	ypkA	putative targeted effector protein kinase, ypkA	pCD1
YPCD1.73c	1.53097	2.8898	YPCD1.73c	hypothetical protein	pCD1
YPCD1.77c	2.03674	4.10318	repA, repA1	putative replication initiation protein, repA, repA1	pCD1
YPCD1.90	1.60616	3.04441	tnpR	putative resolvase, tnpR	pCD1
YPMT1.34	6.88755	118.402	YPMT1.34	hypothetical protein	pMT1
YPMT1.34A	6.23701	75.4269	YPMT1.34A	hypothetical protein	pMT1
YPMT1.54	2.32681	5.01694	YPMT1.54	hypothetical protein	pMT1
YPMT1.69	1.05965	2.08443	YPMT1.69	hypothetical protein	pMT1
YPMT1.81c	-3.96028	-15.5655	caf1R	putative F1 operon positive regulatory protein, caf1R	pMT1
YPMT1.82	-3.87473	-14.6694	caf1M	putative F1 chaperone protein, caf1M	pMT1
YPMT1.83	-3.04814	-8.27147	caf1A	putative F1 capsule anchoring protein, caf1A	pMT1
YPMT1.84	-3.26528	-9.61495	caf1	putative F1 capsule antigen, caf1	pMT1
YPO0105	1.46251	2.75587	hslU	ATP-binding heat shock protein	Adaptions and atypical conditions
YPO0106	1.42677	2.68844	hslV	heat shock protein	Adaptions and atypical conditions
YPO0130	-1.335	-2.52275	YPO0130	putative exported protein	Cell envelop
YPO0138	-1.43589	-2.7055	pckA, pck	phosphoenolpyruvate carboxykinase [ATP]	Central intermediary metabolism
YPO0139	1.17986	2.26554	hslO	heat-shock chaperonin	Adaptions and atypical conditions
YPO0140	1.23317	2.35083	hslR	heat shock protein 15	Adaptions and atypical conditions
YPO0182	-2.51584	-5.71929	tauA, ssiA	putative taurine-binding periplasmic protein precursor	Transport/binding proteins
YPO0183	-1.39775	-2.63491	tauB, ssiB	putative taurine transport ATP-binding protein	Transport/binding proteins
YPO0184	-1.9101	-3.75836	tauC, ssiC	putative taurine transport system permease protein	Transport/binding proteins
YPO0185	-2.57309	-5.95082	tauD, ssiD	putative taurine dioxygenase	Degradation of small molecule
YPO0186	-1.53789	-2.9037	rafQ	putative LPS biosynthetic enzyme (91001-pseudo)	Unknown
YPO0194	-1.03247	-2.04553	YPO0194	conserved hypothetical protein	Unknown
YPO0206	-2.08825	-4.25233	bfr	bacterioferritin	Biosynthesis of cofactors, prosthetic groups and carriers
YPO0209	1.26312	2.40014	rpsJ, nusE	30S ribosomal protein S10	Synthesis and modification of macromolecules
YPO0210	1.54353	2.91507	rplC	50S ribosomal protein L3	Synthesis and modification of macromolecules
YPO0211	1.5041	2.83647	rplD, eryA	50S ribosomal protein L4	Synthesis and modification of macromolecules
YPO0212	1.41634	2.66908	rplW	50S ribosomal protein L23	Synthesis and modification of macromolecules
YPO0213	1.38135	2.60512	rplB	50S ribosomal protein l2	Synthesis and modification of macromolecules
YPO0214	1.06569	2.09316	rpsS	30S ribosomal protein S19	Synthesis and modification of macromolecules
YPO0215	1.28967	2.44472	rplV, eryB	50S ribosomal protein L22	Synthesis and modification of macromolecules
YPO0216	1.13914	2.2025	rpsC	30S ribosomal protein S3	Synthesis and modification of macromolecules
YPO0217	1.04505	2.06344	rplP	50S ribosomal protein L16	Synthesis and modification of macromolecules
YPO0252	-2.72445	-6.60906	YPO0252	putative membrane protein	Cell envelop
YPO0253	-5.04752	-33.0715	acs	acetyl-coenzyme A synthetase	Degradation of small molecule
YPO0283	-1.042	-2.05908	hmuR	hemin receptor precursor	Transport/binding proteins
YPO0294	1.40429	2.64688	terZ	tellurium resistance protein	Drug/analogue sensitivity
YPO0295	1.02388	2.03339	terA	putative tellurite resistance protein	Drug/analogue sensitivity
YPO0383	-1.08664	-2.12379	aidB	putative acyl-CoA dehydrogenase	Unknown
YPO0408	-1.74606	-3.35441	YPO0408	putative aldolase	Unknown
YPO0409	-2.10363	-4.29789	YPO0409	putative periplasmic solute-binding protein	Cell processes - Transport/binding proteins
YPO0410	-1.07988	-2.11386	YPO0410	putative ABC transporter permease protein	Cell processes - Transport/binding proteins
YPO0412	-1.73097	-3.3195	YPO0412	putative ABC transporter ATP-binding protein	Cell processes - Transport/binding proteins
YPO0423	1.11139	2.16054	YPO0423	hypothetical protein	Unknown
YPO0425	1.24767	2.37457	hmsT	HmsT protein	Unknown
YPO0431	-1.38135	-2.60512	osmY, b4376	osmotically inducible protein Y	Unknown
YPO0569a	-1.03368	-2.04724	YPO0569a	conserved hypothetical protein	Unknown
YPO0570	-1.1648	-2.24203	yqjD	putative membrane protein	Cell envelop
YPO0572	-1.02015	-2.02813	YPO0572	putative exported protein	Cell envelop
YPO0627	1.12067	2.17447	YPO0627	putative translational inhibitor protein	Unknown
YPO0628	1.17	2.25011	YPO0628	putative translational inhibitor protein	Unknown
YPO0660	-1.15246	-2.22293	YPO0660	conserved hypothetical protein	Unknown
YPO0661	-1.09261	-2.1326	YPO0661	putative exported protein	Cell envelop
YPO0676	-1.44317	-2.71918	YPO0676	putative aldo/keto reductase family protein	Unknown
YPO0819	-2.53888	-5.81137	YPO0819	putative carbonic anhydrase	Unknown
YPO0881	1.04432	2.06239	YPO0881	conserved hypothetical protein	Unknown
YPO0882	1.04023	2.05656	YPO0882	conserved hypothetical protein	Unknown
YPO0998	-1.21785	-2.326	YPO0998	putative membrane protein	Cell envelop
YPO1033	-1.72118	-3.29705	YPO1033	conserved hypothetical protein	Unknown
YPO1041	-1.06137	-2.08691	dapD	2,3,4,5-tetrahydropyridine-2-carboxylate N-succinyltransferase	Amino acid biosynthesis
YPO1073	1.13375	2.19429	abc	ABC transporter ATP-binding protein	Cell processes - Transport/binding proteins
YPO1125	1.27668	2.42281	pal, excC	peptidoglycan-associated lipoprotein Pal	Cell envelop
YPO1169	1.15789	2.23131	YPO1169	putative LysR-family regulatory protein	Broad regulatory functions
YPO1177	-1.5172	-2.86235	dld	D-lactate dehydrogenase	Energy metabolism
YPO1207	-2.11241	-4.32412	katA	catalase	Cell processes - Detoxification
YPO1231	1.47862	2.78681	pla2	putative outer membrane-associated protease	Degradation of macromolecules
YPO1233	1.0493	2.06953	YPO1233	putative prophage repressor protein	Phage-related functions and prophage
YPO1234	2.2646	4.80521	YPO1234	probable phage antitermination protein Q	Phage-related functions and prophage
YPO1270	-1.46314	-2.75708	YPO1270	putative ABC transporter ATP-binding subunit	Cell processes - Transport/binding proteins
YPO1283	1.01529	2.02131	uxuA	mannonate dehydratase	Degradation of small molecule
YPO1301	2.03508	4.09847	psaE	Psa type pili regulatory protein	Broad regulatory functions
YPO1303	2.41951	5.3499	psaA	pH 6 antigen precursor (antigen 4) (adhesin)	Cell envelop
YPO1304	2.54805	5.84843	psaB	chaperone protein PsaB precursor	cell processes - Chaperones, chaperonins, heat shock
YPO1316	-2.96682	-7.81811	YPO1316	putative iron/ascorbate oxidoreductase family protein	Unknown
YPO1317	-2.29471	-4.90655	YPO1317	putative exported protein	Cell envelop
YPO1318	-2.29763	-4.91648	abc	putative ABC transport ATP-binding subunit	Cell processes - Transport/binding proteins
YPO1320	-1.41576	-2.66801	dacC	D-alanyl-D-alanine carboxypeptidase	Cell envelop
YPO1397	-1.1667	-2.24498	YPO1397	conserved hypothetical protein	Unknown
YPO1449	1.30572	2.47207	cnf	cytotoxic necrotizing factor (partial)	Cell processes - Pathogenicity
YPO1516	-1.35528	-2.55847	YPO1516	hypothetical protein	Unknown
YPO1517	-2.03717	-4.1044	YPO1517	putative sugar ABC transporter	Transport/binding proteins
YPO1574	2.27744	4.84817	YPO1574	putative exported protein	Cell envelop
YPO1635	-1.89971	-3.73139	YPO1635	putative lipoprotein	Cell envelop
YPO1652	1.00369	2.00513	ylaC	putative membrane protein	Cell envelop
YPO1671	1.37328	2.59058	YPO1671	putative DNA-binding protein	Unknown
YPO1706	1.15915	2.23326	htpX	putative heat shock protein	Adaptions and atypical conditions
YPO1707	1.56548	2.95976	YPO1707	putative fimbrial protein	Cell envelop
YPO1718	2.41022	5.31555	YPO1718	putative exported protein	Cell envelop
YPO1761	-1.49761	-2.82375	hpaG, hpcE	4-hydroxyphenylacetate degradation bifunctional isomerase/decarboxylase (pseudogene)	Degradation of small molecule
YPO1764	-1.93578	-3.82586	hpaD	3,4-dihydroxyphenylacetate 2,3-dioxygenase	Degradation of small molecule
YPO1765	-2.02688	-4.07522	hpaF	5-carboxymethyl-2-hydroxymuconate delta-isomerase	Degradation of small molecule
YPO1766	-1.56584	-2.96049	hpaH, hpcG	2-oxo-hept-3-ene-1,7-dioate hydratase	Degradation of small molecule
YPO1767	-1.63693	-3.11002	hpaI, hpcH	2,4-dihydroxyhept-2-ene-1,7-dioic acid aldolase	Degradation of small molecule
YPO1778	-1.18201	-2.26893	YPO1778	conserved hypothetical protein	Unknown
YPO1810	1.62917	3.09335	YPO1810	putative transcriptional regulatory protein	Broad regulatory functions
YPO1848	-1.30731	-2.4748	yecC	putative amino-acid ABC transporter (ATP-binding protein)	Transport/binding proteins
YPO1851	1.65846	3.1568	putA, poaA	bifunctional PutA protein [includes: proline dehydrogenase and delta-1-pyrroline-5-carboxylate	Degradation of small molecule
YPO1857	-1.11858	-2.17133	wrbA	trp repressor binding protein, Yersiniabactin synthesis	Broad regulatory functions
YPO1962	-1.69069	-3.22811	astC, argM, cstC	succinylornithine aminotransferase	Degradation of small molecule
YPO1963	-2.14813	-4.43252	astA	arginine N-succinyltransferase	Degradation of small molecule
YPO1964	-1.54986	-2.92789	astD	succinylglutamic semialdehyde dehydrogenase	Degradation of small molecule
YPO1965	-1.13147	-2.19082	astB	succinylarginine dihydrolase	Degradation of small molecule
YPO1966	-1.31058	-2.48042	astE	succinylglutamate desuccinylase	Degradation of small molecule
YPO1971	-1.20688	-2.30837	hutG	putative N-formylglutamate amidohydrolase	Degradation of small molecule
YPO1972	-1.29668	-2.45663	hutI	imidazolonepropionase	Degradation of small molecule
YPO2068	1.59421	3.01928	YPO2068	putative integral membrane protein	Cell envelop
YPO2073	-1.12164	-2.17594	YPO2073	putative lipoprotein	Cell envelop
YPO2074	-1.12741	-2.18467	fadD	long-chain-fatty-acid-CoA ligase	Degradation of small molecule
YPO2145	-1.35265	-2.5538	YPO2145	conserved hypothetical protein	Unknown
YPO2152	-1.30885	-2.47744	YPO2152	conserved hypothetical protein	Unknown
YPO2180	-1.17901	-2.26421	adhE, ana	aldehyde-alcohol dehydrogenase	Energy metabolism
YPO2182	1.06133	2.08685	oppA	periplasmic oligopeptide-binding protein precursor	Cell processes - Transport/binding proteins
YPO2183	1.14349	2.20914	oppB	oligopeptide transport system permease protein	Cell processes - Transport/binding proteins
YPO2214	1.68026	3.20486	btuR, cobA	cob(I)alamin adenosyltransferase	Biosynthesis of cofactors, prosthetic groups and carriers
YPO2215	1.69611	3.24026	YPO2215	putative short chain dehydrogenase	Unknown
YPO2218	1.77656	3.42609	topA, supX	DNA topoisomerase I	Synthesis and modification of macromolecules
YPO2227	1.10942	2.15759	pyrF	orotidine 5'-phosphate decarboxylase	Purines, pyrimidines, nucleosides and nucleotides biosynthesis
YPO2301	-1.29538	-2.45441	YPO2301	putative stress protein	Unknown
YPO2337	1.0127	2.01768	YPO2337	putative regulatory protein	Broad regulatory functions
YPO2349	1.23698	2.35705	pspC	phage shock protein C	Adaptions and atypical conditions
YPO2350	1.45815	2.74755	pspB	phage shock protein B	Adaptions and atypical conditions
YPO2351	1.87485	3.66764	pspA	phage shock protein A	Adaptions and atypical conditions
YPO2360	-2.16127	-4.47309	YPO2360	conserved hypothetical protein	Unknown
YPO2374	2.70655	6.5276	rovA	MarR-family transcriptional regulatory protein, Inv and virulence regulation	Broad regulatory functions
YPO2390	-1.50032	-2.82906	cfa, cdfA	cyclopropane-fatty-acyl-phospholipid synthase	Fatty acid biosynthesis
YPO2393	-1.88495	-3.69339	pykF	pyruvate kinase I	Energy metabolism
YPO2409	-1.7031	-3.256	ppsA, pps	phosphoenolpyruvate synthase	Central intermediary metabolism
YPO2449	-1.62986	-3.09482	YPO2449	putative LuxR-family regulatory protein	Broad regulatory functions
YPO2478	1.20095	2.29891	mtlK	putative mannitol transport ATP-binding protein	Transport/binding proteins
YPO2483	1.18766	2.27783	YPO2483	hypothetical protein	Unknown
YPO2510	-1.62029	-3.07437	dps	putative DNA-binding protein	Adaptions and atypical conditions
YPO2559	1.28948	2.4444	YPO2559	conserved hypothetical protein	Unknown
YPO2614	-1.422	-2.67957	gltJ	putative glutamate/aspartate transport system permease	Transport/binding proteins
YPO2615	-2.32258	-5.00225	glnH	putative amino acid-binding protein precursor	Transport/binding proteins
YPO2666	-1.19992	-2.29726	ureB, yeuB	urease beta subunit	Cell processes - Pathogenicity
YPO2667	-1.06465	-2.09167	ureC, yeuC	urease alpha subunit	Cell processes - Pathogenicity
YPO2668	-1.00014	-2.0002	ureE	urease accessory protein	Cell processes - Pathogenicity
YPO2698	1.3127	2.48406	YPO2698	conserved hypothetical protein (pseudogene)	Unknown
YPO2705	1.03521	2.04941	YPO2705	conserved hypothetical protein	Unknown
YPO2744	-2.50895	-5.69205	hisJ	histidine-binding periplasmic protein	Transport/binding proteins
YPO2854	-1.52617	-2.8802	YPO2854	conserved hypothetical protein	Unknown
YPO2857	1.19834	2.29476	ykfE, ivy	putative exported protein	Cell envelop
YPO2896	1.04234	2.05956	iscS, nifS, yfhO	putative aminotransferase	Unknown
YPO3010	-2.54497	-5.83595	YPO3010	hypothetical protein	Unknown
YPO3011	-2.24939	-4.75481	cysM	cysteine synthase B	Amino acid biosynthesis
YPO3012	-2.1153	-4.33281	cysA	sulfate transport ATP-binding protein	Transport/binding proteins
YPO3013	-1.76487	-3.39844	cysW	sulfate transport system permease protein CysW	Transport/binding proteins
YPO3014	-2.71713	-6.57562	cysT	sulfate transport system permease protein CysT	Transport/binding proteins
YPO3015	-3.2751	-9.68064	cysP	thiosulfate-binding protein	Transport/binding proteins
YPO3050	-2.58078	-5.98261	YPO3050	putative exported protein	Cell envelop
YPO3119	1.5975	3.02617	htpG	heat shock protein HtpG	cell processes - Chaperones, chaperonins, heat shock
YPO3128	-1.22478	-2.3372	YPO3128	conserved hypothetical protein	Unknown
YPO3140	-1.52349	-2.87486	ybaY	putative lipoprotein	Cell envelop
YPO3146	1.03574	2.05016	YPO3146	probable AsnC-family regulatory protein	Broad regulatory functions
YPO3150	-1.77792	-3.42932	YPO3150	conserved hypothetical protein	Unknown
YPO3151	-2.40043	-5.27962	YPO3151	conserved hypothetical protein	Unknown
YPO3152	-1.77293	-3.41747	ybaV	putative exported protein	Cell envelop
YPO3155	1.0611	2.08652	lon, capR, deg, muc, lopA	ATP-dependent protease La	Degradation of macromolecules
YPO3198	-1.08768	-2.12533	ggt	gamma-glutamyltranspeptidase precursor (pseudogene)	Biosynthesis of cofactors, prosthetic groups and carriers
YPO3266	1.25343	2.38407	emrR, mprA	MarR-family transcriptional regulatory protein, Drug resistance	Broad regulatory functions
YPO3286	2.30786	4.95147	aroF	phospho-2-dehydro-3-deoxyheptonate aldolase, tyr-sensitive	Amino acid biosynthesis
YPO3319	-1.73104	-3.31967	katY	catalase-peroxidase	Cell processes - Detoxification
YPO3320	-1.32184	-2.49985	cybC	putative cytochrome B562	Energy metabolism
YPO3321	-1.42233	-2.68018	cybB	probable cytochrome B561	Energy metabolism
YPO3351	-1.24847	-2.37589	YPO3351	putative dehydrogenase	Unknown
YPO3370	-1.76934	-3.40899	cysH	phosphoadenosine phosphosulfate reductase (pseudogene)	Central intermediary metabolism
YPO3371	-1.91737	-3.77734	cysI	sulfite reductase [NADPH] hemoprotein beta-component	Central intermediary metabolism
YPO3372	-2.25038	-4.75809	cysJ	sulfite reductase [NADPH] flavoprotein alpha-component	Central intermediary metabolism
YPO3374	-1.18671	-2.27633	ygcM	putative 6-pyruvoyl tetrahydrobiopterin synthase family protein	Unknown
YPO3375	-2.1552	-4.45431	sodC	superoxide dismutase [Cu-Zn] precursor	Cell processes - Detoxification
YPO3616	1.45185	2.73558	YPO3616	conserved hypothetical protein	Unknown
YPO3623	-2.30411	-4.93863	ssuE	putative NAD(P)H-dependent FMN reductase	Energy metabolism
YPO3624	-2.58246	-5.98959	ssuA	putative aliphatic sulfonates binding protein (91001-pseudo)	Transport/binding proteins
YPO3646	-1.16979	-2.2498	pcp, pcpY, slyB	outer membrane lipoprotein	Cell envelop
YPO3647	-1.74646	-3.35535	YPO3647	conserved hypothetical protein	Unknown
YPO3648	-1.81159	-3.51029	YPO3648	putative 2-hydroxy-3-oxopropionate reductase	Degradation of small molecule
YPO3649	-1.4058	-2.64964	YPO3649	putative gamma carboxymuconolactone decarboxylase	Degradation of small molecule
YPO3650	-1.63568	-3.10734	YPO3650	putative metabolite transport protein	Cell processes - Transport/binding proteins
YPO3652	-1.01424	-2.01984	YPO3652	hypothetical protein	Unknown
YPO3682	1.00421	2.00584	YPO3682	putative lysR-family transcriptional regulatory protein	Broad regulatory functions
YPO3724	-1.64391	-3.12511	aceK	isocitrate dehydrogenase kinase/phosphatase	Energy metabolism
YPO3725	-1.55258	-2.93341	aceA, icl	isocitrate lyase	Energy metabolism
YPO3726	-1.66285	-3.16642	aceB, mas	malate synthase A	Energy metabolism
YPO3766	-1.98902	-3.96967	fadB, oldB	fatty acid oxidation complex alpha subunit	Degradation of small molecule
YPO3767	-1.95478	-3.87657	fadA, oldA	3-ketoacyl-CoA thiolase	Degradation of small molecule
YPO3768	-1.53002	-2.8879	fadI, fre, flrD, fsrC, ubiB	NAD(P)H-flavin reductase	Energy metabolism
YPO3787	-1.73191	-3.32167	YPO3787	putative carboxymethylenebutenolidase	Degradation of small molecule
YPO3893	1.23641	2.35611	YPO3893	putative membrane protein	Cell envelop
YPO3922	1.92345	3.79329	hasA	hemophore HasA	Transport/binding proteins
YPO3938	-2.32615	-5.01465	glgP, glgY	glycogen phosphorylase	Synthesis and modification of macromolecules
YPO3939	-1.76347	-3.39514	glgA	glycogen synthase	Synthesis and modification of macromolecules
YPO3940	-1.69262	-3.23244	glgC	glucose-1-phosphate adenylyltransferase	Synthesis and modification of macromolecules
YPO3941	-1.73799	-3.3357	glgX	putative alpha-amylase	Synthesis and modification of macromolecules
YPO3942	-1.68648	-3.2187	glgB	1,4-alpha-glucan branching enzyme	Synthesis and modification of macromolecules
YPO3969	-1.01166	-2.01623	uspB	universal stress protein B	Adaptions and atypical conditions
YPO3970	-1.29382	-2.45176	uspA	universal stress protein A	Adaptions and atypical conditions
YPO3973	1.02247	2.03139	YPO3973	metalloprotease	Degradation of macromolecules
YPO4016	-1.38628	-2.61404	hutH	histidine ammonia-lyase	Degradation of small molecule
YPO4017	-1.85459	-3.6165	hutU	urocanate hydratase	Degradation of small molecule
YPO4040	1.30875	2.47728	YPO4040	putative exported protein	Cell envelop
YPO4041	1.39651	2.63265	YPO4041	putative fimbrial chaperone	cell processes - Chaperones, chaperonins, heat shock
YPO4054	-1.2972	-2.45752	selA, fdhA	L-seryl-tRNA selenium transferase	Synthesis and modification of macromolecules
YPO4061	-1.65826	-3.15635	sodA	superoxide dismutase [Mn]	Cell processes - Detoxification
YPO4064	-2.2416	-4.72921	YPO4064	hypothetical protein	Unknown
YPO4065	-1.00829	-2.01153	YPO4065	conserved hypothetical protein	Unknown
YPO4070	-1.5972	-3.02555	yiaF	putative exported protein	Cell envelop
YPO4078	-1.36413	-2.57421	YPO4078	putative D-isomer specific 2-hydroxyacid dehydrogenase	Unknown
YPO4086	-1.08678	-2.124	YPO4086	putative lipoprotein	Cell envelop
YPO4108	-1.17727	-2.26149	YPO4108	putative haloacid dehalogenase-like hydrolase	Unknown
YPO4109	-1.6914	-3.22969	YPO4109	putative amino acid transport system permease	Transport/binding proteins
YPO4110	-1.76704	-3.40354	gltJ	putative glutamate/aspartate ABC transport system permease protein	Cell processes - Transport/binding proteins
YPO4111	-2.68115	-6.41368	YPO4111	putative periplasmic solute-binding protein	Cell processes - Transport/binding proteins
YPO4120	-1.32232	-2.50067	atpC, uncC, papG	ATP synthase epsilon subunit protein	Energy metabolism
YPO4121	-1.25859	-2.39262	atpD, uncD, papB	ATP synthase beta subunit protein	Energy metabolism
YPO4122	-1.14614	-2.2132	atpG, uncG, papC	ATP synthase gamma subunit protein	Energy metabolism
YPO4123	-1.05591	-2.07903	atpA, uncA, papA	ATP synthase alpha subunit protein	Energy metabolism
YPPCP1.04	1.00196	2.00271	pim	pesticin immunityprotein	pPCP1
YPPCP1.07	-1.27972	-2.42791	pla	coagulase/fibrinolysin precursor	pPCP1
Fold change represents the mRNA abundance in Y. pestis Δhfq mutant compared with that in the WT strain. Positive numbers show increases, while negative numbers show decreases.
